# Supplementary material for: Dietary Glycemic Load and Plasma Amyloid-β Biomarkers of Alzheimer’s Disease
Source: MDPI journal article supplement (doi:10.3390/nu14122485), 2022-06-15
Supplement: s1 [file s1]

# Supplementary Files

**Table S1.** Glycemic load values of each item of the FFQ and mean glycemic load of the sample according to the meal types.

| FFQ items                         | Glycemic load values |                    |                   |                    |
|-----------------------------------|----------------------|--------------------|-------------------|--------------------|
|                                   | Breakfast            | Lunch              | Afternoon-snack   | Dinner             |
| Sandwich                          |                      | 13.5               |                   | 13.5               |
| Pasta                             |                      | 29                 |                   | 29                 |
| Rice                              |                      | 23                 |                   | 23                 |
| Potatoes                          |                      | 17                 |                   | 17                 |
| Legumes                           |                      | 5                  |                   | 5                  |
| Pizza                             |                      | 11                 |                   | 6.24               |
| Soup                              |                      | 11                 | 11                | 11                 |
| Bread, baguette                   | 13.5                 | 13.5               | 13.5              | 13.5               |
| Rusk                              | 7.8                  |                    | 7.8               |                    |
| Jam (or honey)                    | 10.2                 |                    | 10.2              |                    |
| Pastries                          | 15.34                |                    | 15.34             |                    |
| Cereal                            | 20.25                |                    | 20.25             |                    |
| Biscuits                          | 13.44                |                    | 13.44             |                    |
| Cakes                             | 13.44                |                    | 13.44             |                    |
| Fruits                            | 6.24                 | 6.24               | 6.24              | 6.24               |
| Sugar                             | 6.5                  |                    | 6.5               |                    |
| Sweets, chocolate, chocolate bars |                      |                    | 21.84             |                    |
| Stewed fruit                      | 8.17                 | 8.17               | 8.17              | 8.17               |
| Yogurt                            | 2.66                 | 2.66               | 2.66              | 2.66               |
| Milk                              | 3.9                  | 3.9                | 3.9               | 3.9                |
| Hot chocolate                     | 12.04                |                    | 12.04             |                    |
| Fruit juice                       | 16.38                | 16.38              | 16.38             | 16.38              |
| Soda                              | 16.38                | 16.38              | 16.38             | 16.38              |
| Beer                              | 5.28                 | 5.28               | 5.28              | 5.28               |
| <b>Mean (SD) range</b>            | 25.8 (12.7) 0 – 67   | 35.8 (11.8) 0 – 96 | 8.4 (10.7) 0 – 61 | 34.1 (13.3) 0 – 85 |

**Table S2.** Characteristics of the study sample.

| Characteristics                                    | Whole sample  | Dementia-free | Incident dementia |
|----------------------------------------------------|---------------|---------------|-------------------|
| Sample size, <i>n</i>                              | 377           | 326           | 51                |
| Montpellier center, <i>n</i> (%)                   | 204 (54.1)    | 186 (57.0)    | 18 (35.3)         |
| Age, mean (SD), years                              | 76.1 (5.2)    | 76.0 (5.2)    | 76.9 (4.8)        |
| Women, <i>n</i> (%)                                | 227 (60.2)    | 192 (58.9)    | 35 (68.6)         |
| Education level, <i>n</i> (%) <sup>1</sup>         |               |               |                   |
| No school                                          | 104 (27.6)    | 83 (25.5)     | 21 (41.2)         |
| Primary school                                     | 101 (26.8)    | 86 (26.4)     | 15 (29.4)         |
| High school                                        | 88 (23.3)     | 79 (24.2)     | 9 (17.6)          |
| Graduate                                           | 83 (22.0)     | 77 (23.6)     | 6 (11.8)          |
| APOE4 carriers, <i>n</i> (%)                       | 68 (18.0)     | 55 (16.9)     | 13 (25.5)         |
| Creatinine, mean (SD), mmol/L                      | 82.0 (18.7)   | 82.0 (18.9)   | 81.9 (17.4)       |
| Total cholesterol, mean (SD), mmol/L               | 5.92 (1.0)    | 5.92 (1.01)   | 5.87 (0.97)       |
| Mediterranean-like diet, <i>n</i> (%) <sup>1</sup> |               |               |                   |
| 0-3                                                | 64 (17.0)     | 52 (16.0)     | 12 (23.5)         |
| 4-5                                                | 141 (37.4)    | 121 (37.1)    | 20 (39.2)         |
| 6-9                                                | 142 (37.7)    | 127 (39.0)    | 15 (29.4)         |
| Missing values                                     | 30 (7.96)     | 26 (7.98)     | 4 (7.84)          |
| Energy intake, mean (SD), kcal/day                 | 1193 (378)    | 1205 (387)    | 1115 (306)        |
| Glycemic load, mean (SD), /day                     | 111.6 (35.5)  | 113.0 (36.0)  | 102.6 (30.7)      |
| Glycemic load residuals, mean (SD)                 | 0 (13.7)      | 0.347 (13.7)  | -2.22 (13.4)      |
| Plasma A $\beta_{40}$ , mean (SD), pg/mL           | 231.1 (81.1)  | 232.1 (84.6)  | 225.1 (53.5)      |
| Plasma A $\beta_{42}$ , mean (SD), pg/mL           | 39.50 (13.5)  | 39.33 (14.1)  | 40.28 (9.0)       |
| Plasma A $\beta_{42}$ /A $\beta_{40}$ , mean (SD)  | 0.176 (0.046) | 0.175 (0.046) | 0.186 (0.049)     |

Abbreviation: A $\beta$ . amyloid- $\beta$ ; APOE4. Apolipoprotein e  $\epsilon$ 4 allele; SD. standard deviation.

<sup>1</sup> Missing data: education level. 0.27%; Mediterranean-like diet. 8%.

**Table S3.** Association between plasma amyloid- $\beta$  peptides and glycemic load residuals after exclusion of participants with incident dementia (n = 51).

| Glycemic load residuals | $A\beta_{40}$<br>n = 321 |         | $A\beta_{42}$<br>n = 323 |               | $A\beta_{42}/A\beta_{40}$<br>n = 323 |               |
|-------------------------|--------------------------|---------|--------------------------|---------------|--------------------------------------|---------------|
|                         | $\beta$ (CI)             | P value | $\beta$ (CI)             | P value       | $\beta$ (CI)                         | P value       |
| Daily                   | 0.53 (-3.75, 4.8)        | 0.8091  | -0.09 (-0.93, 0.76)      | 0.8407        | -0.0014 (-0.0046, 0.0017)            | 0.375         |
| Breakfast               | 4.4 (-4.21, 13.0)        | 0.3153  | 0.81 (-0.90, 2.52)       | 0.3538        | 0.0005 (-0.006, 0.007)               | 0.8865        |
| Lunch                   | 1.58 (-9.98, 13.1)       | 0.7881  | -2.56 (-4.84, -0.27)     | <b>0.0282</b> | -0.0124 (-0.0213, -0.0036)           | <b>0.0058</b> |
| Afternoon snack         | 1.33 (-12.9, 15.6)       | 0.8542  | -0.29 (-3.14, 2.56)      | 0.8431        | -0.0035 (-0.0145, 0.0074)            | 0.5255        |
| Dinner                  | -1.04 (-11.3, 9.21)      | 0.8414  | -0.1 (-2.14, 1.93)       | 0.9204        | -0.0023 (-0.01, 0.0055)              | 0.5648        |

Abbreviation: A $\beta$ , amyloid- $\beta$ ; CI, confidence interval; GL, glycemic load.

Model was adjusted for center, age, sex, education level, APOE4, energy intake, serum creatinine, total cholesterol, and Mediterranean-like diet.

$\beta$  value for a 10-point increase in the GL value per day (equivalent to eating an additional 30g of a French baguette at each corresponding meal).  $p < 0.05$  are in bold.
